# Supplementary material
Source: publisher figshare collection journal article supplement (https://tandf.figshare.com/articles/dataset/_/14195380)
Supplement: Supplementary file 1 [file 1]

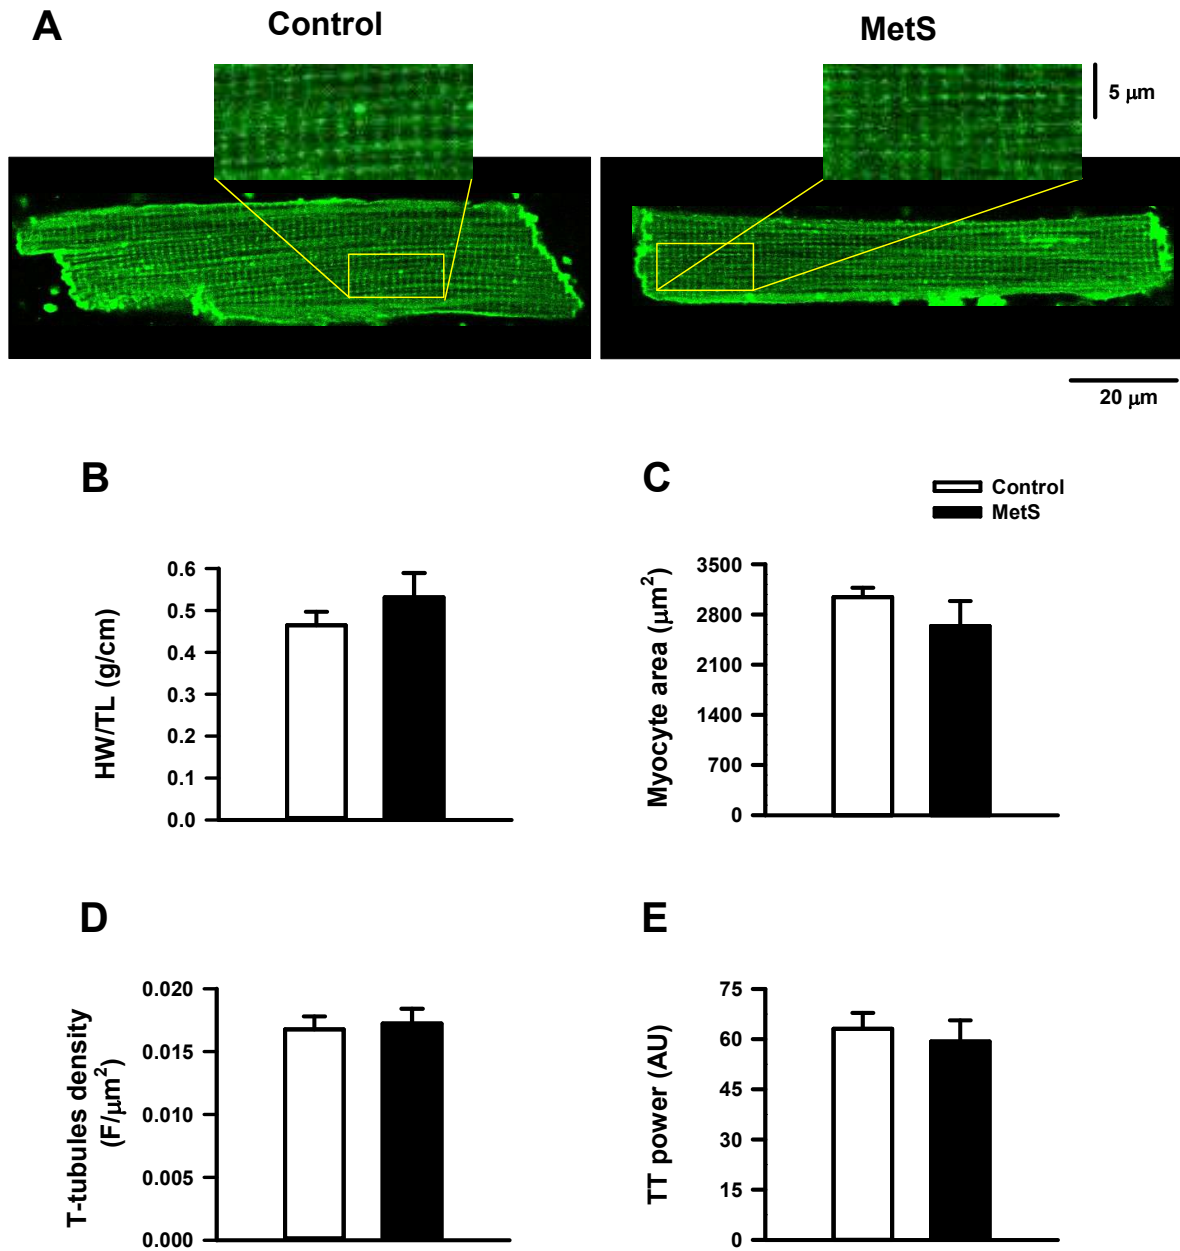

**Figure S2. T-tubule organization in ventricular myocytes and morphological heart data from Control and MetS rats.** **A.** Representative confocal images of T-tubules obtained in Control and MetS myocytes stained with di-8-ANEPPS. Greater details of T-tubule distribution are shown in the insert panels. **B.** Heart Weight/ Tibia Length ratio (HW/TL) in Control and MetS rats. **C.** Myocyte area in Control and MetS myocytes. **D.** T-tubule density
