# Supplementary material
Source: publisher figshare collection journal article supplement (https://tandf.figshare.com/articles/dataset/_/14195380)
Supplement: Supplementary file 2 [file 1]

|                                                           | - DTT                     |                            |                           |                            |
|-----------------------------------------------------------|---------------------------|----------------------------|---------------------------|----------------------------|
|                                                           | Control                   |                            | MetS                      |                            |
|                                                           | BASAL                     | 10 mM Ca <sup>2+</sup>     | BASAL                     | 10 mM Ca <sup>2+</sup>     |
| Frequency<br>(#sparks/100 $\mu$ m/s)                      | 1.86 $\pm$ 0.35<br>(49)   | 5.49 $\pm$ 1.06*<br>(25)   | 0.52 $\pm$ 0.12&<br>(60)  | 2.21 $\pm$ 0.80*&<br>(21)  |
| Amplitude<br>( $\Delta$ F/F <sub>0</sub> )                | 0.76 $\pm$ 0.04<br>(119)  | 0.53 $\pm$ 0.02*<br>(107)  | 0.57 $\pm$ 0.06&<br>(22)  | 0.44 $\pm$ 0.02*&<br>(34)  |
| FDHD<br>(ms)                                              | 19.86 $\pm$ 0.70<br>(119) | 16.61 $\pm$ 0.72*<br>(107) | 20.07 $\pm$ 1.84<br>(22)  | 14.51 $\pm$ 1.21*<br>(34)  |
| FWHD<br>( $\mu$ m)                                        | 2.29 $\pm$ 0.05<br>(119)  | 2.12 $\pm$ 0.05*<br>(107)  | 2.47 $\pm$ 0.14<br>(22)   | 2.07 $\pm$ 0.11*<br>(34)   |
| Ca <sup>2+</sup> waves incidence<br>(#waves/s)            | 0.019 $\pm$ 0.007<br>(24) | 0.172 $\pm$ 0.022*<br>(25) | 0.030 $\pm$ 0.013<br>(20) | 0.105 $\pm$ 0.016*<br>(22) |
| SR Ca <sup>2+</sup> load<br>( $\Delta$ F/F <sub>0</sub> ) | 4.05 $\pm$ 0.27<br>(37)   | 2.38 $\pm$ 0.18*<br>(22)   | 4.16 $\pm$ 0.27<br>(37)   | 2.40 $\pm$ 0.26*<br>(21)   |

**Table S3. Effects of Ca<sup>2+</sup> overload on Ca<sup>2+</sup> sparks, Ca<sup>2+</sup> waves and SR Ca<sup>2+</sup> load in Control and MetS myocytes.** FDHD, full-duration half-maximum. FWHD, full-width half-maximum. Data represent the mean  $\pm$  SEM. \*P<0.001 Basal vs 10 mM Ca<sup>2+</sup>, and &P<0.05 CT vs SM, two-way ANOVA followed by Student Newman–Keuls *post hoc test*.
