# Supplementary material
Source: publisher figshare collection journal article supplement (https://tandf.figshare.com/articles/dataset/_/14195380)
Supplement: Supplementary file 4 [file 1]

**Table S1. Effects of NAC on SCaTs and SR Ca<sup>2+</sup> load.**

| Parameter                                       | Control      | MetS                      | Control +NAC              | MetS + NAC                     |
|-------------------------------------------------|--------------|---------------------------|---------------------------|--------------------------------|
| Peak Amplitude ( $\Delta F/F_0$ )               | 3.55 ± 0.33  | 2.28 ± 0.14 <sup>*</sup>  | 2.44 ± 0.17 <sup>*</sup>  | 2.98 ± 0.20 <sup>&amp;</sup>   |
| d(F/F <sub>0</sub> )/dt ((F/F <sub>0</sub> )/s) | 33.48 ± 2.62 | 22.50 ± 1.74 <sup>*</sup> | 21.52 ± 1.18 <sup>*</sup> | 28.20 ± 1.99 <sup>&amp;#</sup> |
| DT <sub>50</sub> (s)                            | 0.25 ± 0.02  | 0.36 ± 0.04 <sup>*</sup>  | 0.30 ± 0.02               | 0.24 ± 0.01 <sup>&amp;#</sup>  |
| SR Ca <sup>2+</sup> load ( $\Delta F/F_0$ )     | 4.16 ± 0.27  | 4.76 ± 0.30               | 3.86 ± 0.34               | 4.38 ± 0.20                    |

Data represent the mean ± SEM, N= 15-32 cells from 3-4 animals. \*p<0.05 vs Control, &p<0.05 vs MetS and #p<0.05 vs Control + NAC, two-way ANOVA followed by Student Newman–Keuls post hoc test. Peak amplitude ( $\Delta F/F_0$ ), maximal SR Ca<sup>2+</sup> release rate (d(F/F<sub>0</sub>)/dt), time to 50% decay (DT50).
