# Supplementary material
Source: publisher figshare collection journal article supplement (https://tandf.figshare.com/articles/dataset/_/14195380)
Supplement: Supplementary file 5 [file 1]

| Parameter                | Control       | MetS         | Control +NAC  | MetS + NAC    |
|--------------------------|---------------|--------------|---------------|---------------|
| G <sub>max</sub> (nS/nF) | 173.4 ± 10.8  | 166.8 ± 11.3 | 163.8 ± 29.7  | 151.4 ± 7.01  |
| k (mV)                   | 6.34 ± 0.31   | 6.34 ± 0.19  | 6.57 ± 0.17   | 6.36 ± 0.15   |
| V <sub>1/2</sub> (mV)    | - 3.27 ± 1.56 | - 2.49 ± 1.0 | - 3.73 ± 1.25 | - 3.82 ± 0.81 |
| V <sub>rev</sub> (mV)    | 59.92 ± 1.93  | 64.08 ± 1.48 | 59.82 ± 1.74  | 63.40 ± 1.62  |

**Table S2. Boltzmann parameters of I<sub>Ca</sub> in Control and MetS myocytes under basal conditions or after treatment with NAC.** Maximal conductance (G<sub>max</sub>), slope factor (k), voltage dependence of activation (V<sub>1/2</sub>), reversal potential (V<sub>rev</sub>). Data represent the mean ± SEM of 14-17 cells from three Control and two MetS rats. \*P<0.05, two-way ANOVA followed by Student Newman–Keuls *post hoc test*.
